# Supplementary figures and images for: Assessing the Natural Source Zone Depletion of a Petroleum-Contaminated Clayey Soil Site in Southern China Combining Concentration Gradient Method and Metagenomics
Source: MDPI journal article supplement (doi:10.3390/life14030337), 2024-03-04

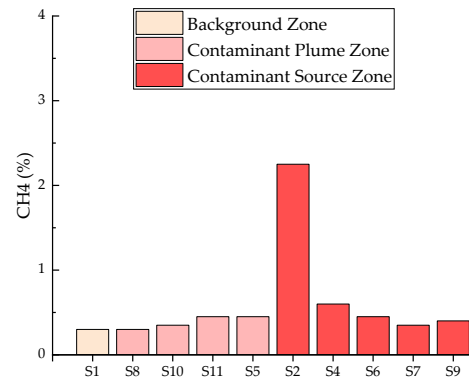

**Figure S1.** The concentration of methane gas in groundwater.

Supplement: s1 [file s1]
